# Supplementary material
Source: PubMed Central journal article supplement (PMC5429211)
Supplement: NIHMS836509-supplement-01.pdf [file NIHMS836509-supplement-01.pdf]

## METHODS

### Quantitative bias assessment

The response rate among subjects targeted for the current study was about 50%. Although the comparable response rates between asthma cases and noncases provide some reassurance, selection bias could have occurred if nonresponse was jointly conditional on both early-life farm exposure and asthma or atopic status. Because we have some surrogate data on both the exposure and outcomes among the entire target population of 44,301 cohort members who completed the second follow-up interview, we were able to perform quantitative selection bias analyses.<sup>E1</sup> As a surrogate for early-life farm exposure, we had the question: "As a child, how much time did you spend around farm animals (for example, cattle, pigs, or chickens)?" Though not identical to our early-life questions, when dichotomized into categories of monthly or more frequently versus never or less than once per month, this surrogate was strongly correlated with the early-life farm exposure variables most associated with atopy in our study (tetrachoric correlations, 0.73-0.84;  $P < .0001$  for all correlations).

When we analyzed the surrogate variable for farm animal contact before age 18 in the entire target population, the OR for asthma was 0.93, which is identical to that for the subjects enrolled in our study. For atopy, IgE measurements were only made in participants in our substudy so we used the following surrogate atopy end point available on all 44,301 cohort members: self-report of diagnosis of hay fever, seasonal allergies, or allergic rhinitis. When we examined the association between our surrogate early-life farm animal exposure variable and surrogate atopy end point in the entire target population, we observed reduced odds of atopy (OR, 0.86; 95% CI, 0.81-0.96). Among our study participants, the corresponding OR is nearly identical at 0.89 with a wider CI (0.72-1.10), reflecting the much smaller sample size. Thus, our quantitative bias assessment reassuringly indicates a lack of selection bias for the evaluation of the association of early-life farm exposure with asthma and atopy.

## REFERENCE

- E1. Lash TL, Fox MP, Fink AK. Applying quantitative bias analysis to epidemiologic data. New York, NY: Springer; 2009.

### Associations Between Early Life Animal Exposures and Atopy to Inhaled Allergens in the Agricultural Lung Health Study

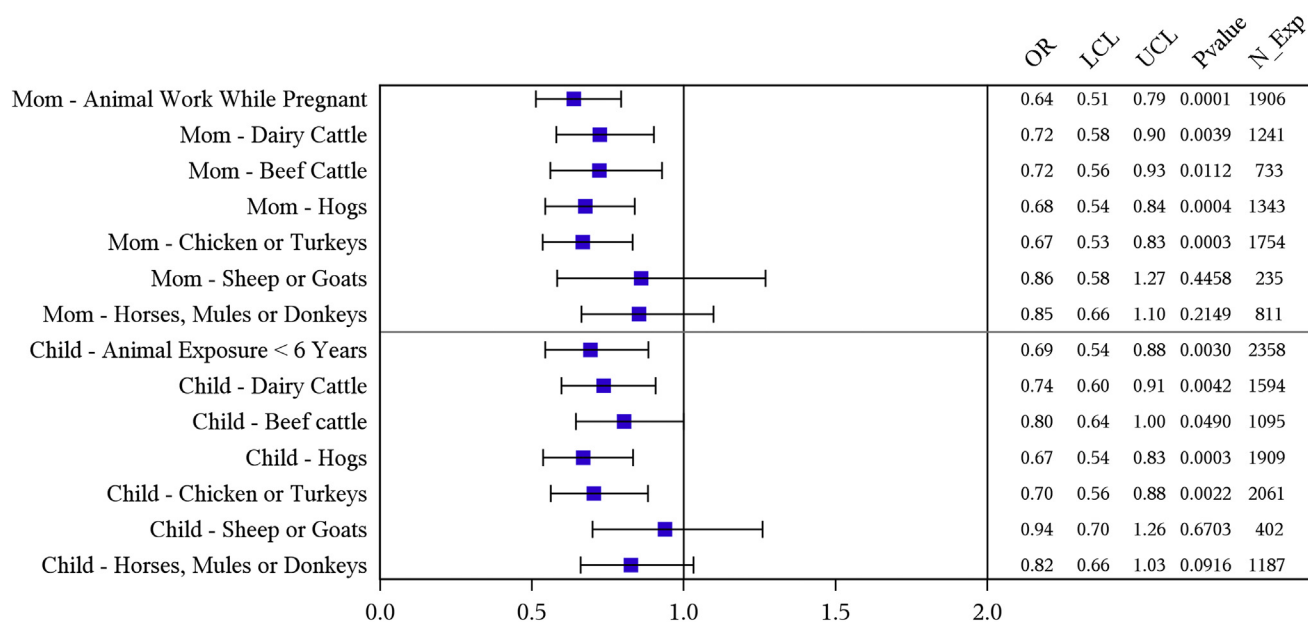

Inhaled Atopy Defined as IgE > 0.70 IU/mL For 1 or More Seasonal and Perennial Allergens

### Associations Between Early Life Animal Exposures and Any Atopy in the Agricultural Lung Health Study

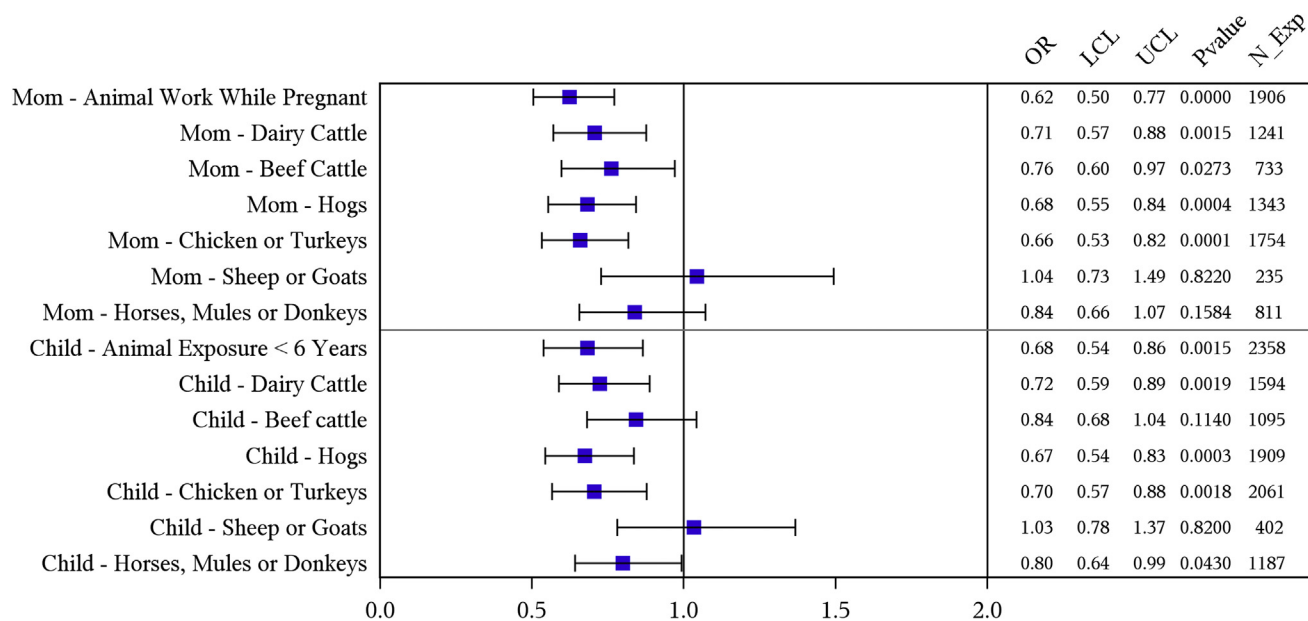

Any Atopy Defined as IgE > 0.70 IU/mL For 1 or More Allergens

**FIG E1.** Associations between exposure to specific farm animals and adult atopy in the ALHS. Results are adjusted for age, sex, race, state, pack years, and asthma case-control status. *LCL/UCL*, Lower/upper confidence limit (95%); *N\_Exp*, count of exposed individuals.

**TABLE E1.** Questions from the ALHS early life questionnaire analyzed for association with asthma or atopy

| Question                                                                                                                                                                                      | Possible responses                                                                              |
|-----------------------------------------------------------------------------------------------------------------------------------------------------------------------------------------------|-------------------------------------------------------------------------------------------------|
| Did your mother live on a farm while she was pregnant with you?                                                                                                                               | Yes, no, don't know                                                                             |
| Did your mother perform any farm activities while she was pregnant with you?                                                                                                                  | Yes, no, don't know                                                                             |
| Did your mother work with or around farm animals such as cattle, horses, hogs, poultry, sheep or goats while pregnant with you?                                                               | Yes, no, don't know                                                                             |
| If yes, which of the following types of animals did your mother work with or around?                                                                                                          | Yes, no, don't know                                                                             |
| Dairy cattle                                                                                                                                                                                  | Yes, no, don't know                                                                             |
| Beef cattle                                                                                                                                                                                   | Yes, no, don't know                                                                             |
| Hogs                                                                                                                                                                                          | Yes, no, don't know                                                                             |
| Chickens or turkeys                                                                                                                                                                           | Yes, no, don't know                                                                             |
| Sheep or goats                                                                                                                                                                                | Yes, no, don't know                                                                             |
| Horses, mules, or donkeys                                                                                                                                                                     | Yes, no, don't know                                                                             |
| Was your family living on a farm when you were born, regardless of whether they were doing farm work?                                                                                         | Yes, no, don't know                                                                             |
| At any time before you were age 3, did you spend time around farm animals, such as cattle, horses, hogs, poultry, sheep or goats at least weekly or for months at a time?                     | Yes, no, don't know                                                                             |
| At any time between age 3 and your sixth birthday, did you spend time around farm animals at least weekly or for months at a time?                                                            | Yes, no, don't know                                                                             |
| Up until your sixth birthday, which of the following types of farm animals did you spend time around?                                                                                         |                                                                                                 |
| Dairy cattle                                                                                                                                                                                  | Yes, no, don't know                                                                             |
| Beef cattle                                                                                                                                                                                   | Yes, no, don't know                                                                             |
| Hogs                                                                                                                                                                                          | Yes, no, don't know                                                                             |
| Chickens or turkeys                                                                                                                                                                           | Yes, no, don't know                                                                             |
| Sheep or goats                                                                                                                                                                                | Yes, no, don't know                                                                             |
| Horses, mules, or donkeys                                                                                                                                                                     | Yes, no, don't know                                                                             |
| Were you ever breastfed as an infant?                                                                                                                                                         | Yes, no, don't know                                                                             |
| When you were a child, what was the main type of milk served in your home?                                                                                                                    | Raw milk, pasteurized/store-bought milk,<br>no milk was served at home, don't know              |
| Have you ever drunk raw milk?                                                                                                                                                                 | Yes, no, don't know                                                                             |
| If yes, how old were you when you first drank raw milk? If you are not sure of your answer, please provide your best guess.                                                                   | Less than 1 year, 1 year old, 2 years old, 3 years old,<br>4 years old, 5 years old, 6 or older |
| How old were you when you last drank raw milk? If less than 1 year old, write "00." If you still drink raw milk, write your current age. If you are not sure, please provide your best guess. | Open response                                                                                   |
| At any time before you were age 6, did you have any dogs, cats, other furry pets such as hamsters, or birds living inside your home?                                                          | Yes, no, don't know                                                                             |
| Did your mother smoke cigarettes when she was pregnant with you?                                                                                                                              | Yes, no, don't know                                                                             |
| At any time before you were age 6, did anyone living in your home smoke cigarettes?                                                                                                           | Yes, no, don't know                                                                             |
| If yes, at any time before you were age 6, did your mother smoke cigarettes?                                                                                                                  | Yes, no, don't know                                                                             |
| If yes, at any time before you were age 6, did your father smoke cigarettes?                                                                                                                  | Yes, no, don't know                                                                             |

**TABLE E2.** Sensitivity analysis of associations between early-life farm exposures and current asthma in the ALHS

| Early-life exposures*                           | Noncases n | Excluding asthma cases with COPD overlap |                  | Excluding asthma cases with COPD overlap and likely undiagnosed asthma cases |                  |
|-------------------------------------------------|------------|------------------------------------------|------------------|------------------------------------------------------------------------------|------------------|
|                                                 |            | Cases n                                  | OR (95% CI)†     | Cases n                                                                      | OR (95% CI)†     |
| Total                                           | 2031       | 1161                                     |                  | 860                                                                          |                  |
| Mother lived on farm while pregnant             |            |                                          |                  |                                                                              |                  |
| No                                              | 476        | 321                                      | Ref              | 253                                                                          | Ref              |
| Yes                                             | 1534       | 822                                      | 0.88 (0.73-1.04) | 594                                                                          | 0.81 (0.67-0.98) |
| Missing                                         | 21         | 18                                       |                  | 13                                                                           |                  |
| Mother performed farm activities while pregnant |            |                                          |                  |                                                                              |                  |
| No                                              | 604        | 367                                      | Ref              | 283                                                                          | Ref              |
| Yes                                             | 1332       | 728                                      | 1.01 (0.86-1.20) | 535                                                                          | 0.96 (0.80-1.15) |
| Missing                                         | 95         | 66                                       |                  | 42                                                                           |                  |
| Mother worked with farm animals while pregnant  |            |                                          |                  |                                                                              |                  |
| No                                              | 624        | 364                                      | Ref              | 275                                                                          | Ref              |
| Yes                                             | 1257       | 696                                      | 1.09 (0.92-1.29) | 512                                                                          | 1.05 (0.87-1.27) |
| Missing                                         | 150        | 101                                      |                  | 73                                                                           |                  |
| Family lived on farm when born                  |            |                                          |                  |                                                                              |                  |
| No                                              | 472        | 320                                      | Ref              | 250                                                                          | Ref              |
| Yes                                             | 1537       | 826                                      | 0.88 (0.74-1.05) | 596                                                                          | 0.81 (0.67-0.98) |
| Missing                                         | 22         | 15                                       |                  | 14                                                                           |                  |
| Farm animal exposure before age 3               |            |                                          |                  |                                                                              |                  |
| No                                              | 540        | 308                                      | Ref              | 233                                                                          | Ref              |
| Yes                                             | 1313       | 739                                      | 1.10 (0.93-1.32) | 542                                                                          | 1.08 (0.89-1.32) |
| Missing                                         | 178        | 114                                      |                  | 85                                                                           |                  |
| Farm animal exposure before age 6               |            |                                          |                  |                                                                              |                  |
| No                                              | 409        | 232                                      | Ref              | 185                                                                          | Ref              |
| Yes                                             | 1538       | 887                                      | 1.18 (0.97-1.43) | 643                                                                          | 1.08 (0.88-1.33) |
| Missing                                         | 84         | 42                                       |                  | 32                                                                           |                  |
| Breast-fed                                      |            |                                          |                  |                                                                              |                  |
| No                                              | 684        | 398                                      | Ref              | 290                                                                          | Ref              |
| Yes                                             | 961        | 549                                      | 1.16 (0.97-1.39) | 409                                                                          | 1.16 (0.96-1.42) |
| Missing                                         | 386        | 214                                      |                  | 161                                                                          |                  |
| Raw milk                                        |            |                                          |                  |                                                                              |                  |
| No                                              | 422        | 235                                      | Ref              | 181                                                                          | Ref              |
| Yes                                             | 1498       | 856                                      | 1.23 (1.01-1.50) | 629                                                                          | 1.14 (0.92-1.41) |
| Missing                                         | 111        | 70                                       |                  | 50                                                                           |                  |
| Indoor furry pets before age 6                  |            |                                          |                  |                                                                              |                  |
| No                                              | 1480       | 810                                      | Ref              | 584                                                                          | Ref              |
| Yes                                             | 507        | 332                                      | 1.15 (0.98-1.36) | 263                                                                          | 1.26 (1.05-1.50) |
| Missing                                         | 44         | 19                                       |                  | 13                                                                           |                  |
| Mother smoked cigarettes when pregnant          |            |                                          |                  |                                                                              |                  |
| No                                              | 1764       | 991                                      | Ref              | 723                                                                          | Ref              |
| Yes                                             | 169        | 113                                      | 1.12 (0.87-1.45) | 94                                                                           | 1.27 (0.96-1.67) |
| Missing                                         | 98         | 57                                       |                  | 43                                                                           |                  |
| Parents smoked cigarettes in house before age 6 |            |                                          |                  |                                                                              |                  |
| No                                              | 936        | 485                                      | Ref              | 338                                                                          | Ref              |
| Yes                                             | 1043       | 637                                      | 1.18 (1.02-1.38) | 492                                                                          | 1.27 (1.08-1.51) |
| Missing                                         | 52         | 39                                       |                  | 30                                                                           |                  |

\*Exposures are modeled individually, one at a time.

†Logistic regression used to estimate ORs adjusted for age, sex, race, state, and pack years.

**TABLE E3.** Associations between early-life exposures to farm animals and current asthma in the ALHS

|                           | Mother worked with farm animals while pregnant* |          |                  |         | Farm animals before age 6* |          |                  |         |
|---------------------------|-------------------------------------------------|----------|------------------|---------|----------------------------|----------|------------------|---------|
|                           | Cases                                           | Noncases | OR (95% CI)†     | P value | Cases                      | Noncases | OR (95% CI)†     | P value |
| Any farm animals          |                                                 |          |                  |         |                            |          |                  |         |
| No                        | 371                                             | 624      | Ref              |         | 238                        | 409      | Ref              |         |
| Yes                       | 722                                             | 1257     | 1.10 (0.93-1.30) | .28     | 913                        | 1538     | 1.18 (0.97-1.42) | .10     |
| Missing                   | 105                                             | 150      |                  |         | 47                         | 84       |                  |         |
| Dairy cattle              |                                                 |          |                  |         |                            |          |                  |         |
| No                        | 575                                             | 1002     | Ref              |         | 511                        | 842      | Ref              |         |
| Yes                       | 473                                             | 814      | 1.14 (0.97-1.34) | .11     | 612                        | 1049     | 1.1 (0.94-1.29)  | .24     |
| Missing                   | 150                                             | 215      |                  |         | 75                         | 140      |                  |         |
| Beef cattle               |                                                 |          |                  |         |                            |          |                  |         |
| No                        | 739                                             | 1263     | Ref              |         | 662                        | 1113     | Ref              |         |
| Yes                       | 272                                             | 498      | 0.97 (0.81-1.17) | .78     | 422                        | 722      | 1.03 (0.87-1.21) | .73     |
| Missing                   | 187                                             | 270      |                  |         | 114                        | 196      |                  |         |
| Hogs                      |                                                 |          |                  |         |                            |          |                  |         |
| No                        | 526                                             | 887      | Ref              |         | 382                        | 614      | Ref              |         |
| Yes                       | 490                                             | 902      | 1.03 (0.87-1.21) | .75     | 722                        | 1260     | 1.04 (0.87-1.22) | .69     |
| Missing                   | 182                                             | 242      |                  |         | 94                         | 157      |                  |         |
| Chickens or turkeys       |                                                 |          |                  |         |                            |          |                  |         |
| No                        | 423                                             | 701      | Ref              |         | 336                        | 562      | Ref              |         |
| Yes                       | 659                                             | 1160     | 1.08 (0.91-1.27) | .39     | 788                        | 1354     | 1.11 (0.93-1.32) | .23     |
| Missing                   | 116                                             | 170      |                  |         | 74                         | 115      |                  |         |
| Sheep or goats            |                                                 |          |                  |         |                            |          |                  |         |
| No                        | 950                                             | 1617     | Ref              |         | 942                        | 1572     | Ref              |         |
| Yes                       | 83                                              | 161      | 0.95 (0.71-1.25) | .70     | 155                        | 265      | 1.05 (0.84-1.3)  | .69     |
| Missing                   | 165                                             | 253      |                  |         | 101                        | 194      |                  |         |
| Horses, mules, or donkeys |                                                 |          |                  |         |                            |          |                  |         |
| No                        | 735                                             | 1241     | Ref              |         | 659                        | 1092     | Ref              |         |
| Yes                       | 308                                             | 542      | 1.13 (0.94-1.36) | .20     | 459                        | 773      | 1.14 (0.96-1.35) | .14     |
| Missing                   | 155                                             | 248      |                  |         | 80                         | 166      |                  |         |

\*Exposures are modeled individually.

†Logistic regression used to estimate ORs adjusted for age, sex, race, state, and pack years.

**TABLE E4.** Associations between raw milk consumption and current asthma in the ALHS

| Raw milk exposure*               | Cases | Noncases | OR (95% CI)†     | P value |
|----------------------------------|-------|----------|------------------|---------|
| Ever drank raw milk              |       |          |                  |         |
| No                               | 239   | 422      | Ref              |         |
| Yes                              | 889   | 1498     | 1.23 (1.01-1.49) | .04     |
| Missing                          | 70    | 111      |                  |         |
| Raw milk before or after age 6   |       |          |                  |         |
| Never                            | 239   | 422      | Ref              |         |
| Start after age 6                | 147   | 211      | 1.30 (1.00-1.70) | .05     |
| Start before age 6               | 729   | 1278     | 1.19 (0.97-1.45) | .10     |
| Missing                          | 83    | 120      |                  |         |
| Main milk was raw milk           |       |          |                  |         |
| No                               | 451   | 742      | Ref              |         |
| Yes                              | 698   | 1218     | 1.11 (0.93-1.32) | .25     |
| Missing                          | 49    | 71       |                  |         |
| Ever raw milk, main milk         |       |          |                  |         |
| Never raw milk                   | 233   | 404      | Ref              |         |
| Ever raw milk, main milk not raw | 170   | 265      | 1.17 (0.91-1.51) | .23     |
| Ever raw milk, main milk raw     | 692   | 1203     | 1.20 (0.97-1.47) | .10     |
| Missing                          | 103   | 159      |                  |         |

\*Twenty-four participants (12 cases and 12 noncases) who reported not drinking any type of milk in childhood were included in the referent categories of these analyses (eg, never drank raw milk and main milk not raw). Excluding these individuals did not materially change estimates.

†Logistic regression used to estimate ORs adjusted for age, sex, race, state, and pack years.

**TABLE E5.** Associations between early-life exposures and adult atopy by allergen type in the ALHS

| Early-life exposures*                          | No exposure |           | Exposure |           | OR (95% CI)‡     | P value |
|------------------------------------------------|-------------|-----------|----------|-----------|------------------|---------|
|                                                | Atopic†     | Nonatopic | Atopic   | Nonatopic |                  |         |
| Mother lived on farm when pregnant             |             |           |          |           |                  |         |
| Atopy to any allergen                          | 174         | 588       | 394      | 1901      | 0.68 (0.55-0.85) | .001    |
| Atopy to inhaled allergen                      | 165         | 597       | 368      | 1927      | 0.69 (0.55-0.87) | .001    |
| Atopy to perennial allergen                    | 121         | 641       | 277      | 2018      | 0.74 (0.57-0.95) | .02     |
| Atopy to seasonal allergen                     | 75          | 687       | 171      | 2124      | 0.72 (0.53-0.99) | .04     |
| Atopy to food allergen                         | 27          | 735       | 76       | 2219      | 0.79 (0.49-1.27) | .33     |
| Mother performed farm activities when pregnant |             |           |          |           |                  |         |
| Atopy to any allergen                          | 217         | 711       | 326      | 1683      | 0.60 (0.48-0.74) | <.001   |
| Atopy to inhaled allergen                      | 205         | 723       | 305      | 1704      | 0.61 (0.49-0.75) | <.001   |
| Atopy to perennial allergen                    | 154         | 774       | 228      | 1781      | 0.63 (0.50-0.80) | <.001   |
| Atopy to seasonal allergen                     | 93          | 835       | 144      | 1865      | 0.65 (0.48-0.87) | .004    |
| Atopy to food allergen                         | 36          | 892       | 64       | 1945      | 0.67 (0.44-1.05) | .08     |
| Mother worked with farm animals when pregnant  |             |           |          |           |                  |         |
| Atopy to any allergen                          | 217         | 734       | 305      | 1601      | 0.62 (0.50-0.77) | <.001   |
| Atopy to inhaled allergen                      | 204         | 747       | 286      | 1620      | 0.64 (0.51-0.79) | <.001   |
| Atopy to perennial allergen                    | 150         | 801       | 216      | 1690      | 0.68 (0.53-0.87) | .002    |
| Atopy to seasonal allergen                     | 95          | 856       | 131      | 1775      | 0.66 (0.49-0.89) | .006    |
| Atopy to food allergen                         | 39          | 912       | 58       | 1848      | 0.61 (0.39-0.94) | .03     |
| Family lived on farm when born                 |             |           |          |           |                  |         |
| Atopy to any allergen                          | 175         | 582       | 395      | 1911      | 0.67 (0.54-0.84) | <.001   |
| Atopy to inhaled allergen                      | 165         | 592       | 370      | 1936      | 0.68 (0.55-0.86) | .001    |
| Atopy to perennial allergen                    | 122         | 635       | 277      | 2029      | 0.72 (0.56-0.93) | .01     |
| Atopy to seasonal allergen                     | 76          | 681       | 171      | 2135      | 0.71 (0.52-0.96) | .03     |
| Atopy to food allergen                         | 32          | 725       | 71       | 2235      | 0.60 (0.38-0.94) | .03     |
| Farm animal exposure before age 3              |             |           |          |           |                  |         |
| Atopy to any allergen                          | 182         | 638       | 337      | 1656      | 0.68 (0.54-0.84) | <.001   |
| Atopy to inhaled allergen                      | 173         | 647       | 315      | 1678      | 0.67 (0.54-0.84) | <.001   |
| Atopy to perennial allergen                    | 127         | 693       | 235      | 1758      | 0.70 (0.55-0.90) | .006    |
| Atopy to seasonal allergen                     | 80          | 740       | 148      | 1845      | 0.70 (0.52-0.95) | .02     |
| Atopy to food allergen                         | 26          | 794       | 71       | 1922      | 1.00 (0.62-1.60) | .99     |
| Farm animal exposure before age 6              |             |           |          |           |                  |         |
| Atopy to any allergen                          | 141         | 476       | 419      | 1939      | 0.68 (0.54-0.86) | .002    |
| Atopy to inhaled allergen                      | 133         | 484       | 393      | 1965      | 0.69 (0.54-0.88) | .003    |
| Atopy to perennial allergen                    | 95          | 522       | 297      | 2061      | 0.76 (0.58-1.00) | .05     |
| Atopy to seasonal allergen                     | 63          | 554       | 182      | 2176      | 0.70 (0.50-0.97) | .03     |
| Atopy to food allergen                         | 19          | 598       | 84       | 2274      | 0.99 (0.58-1.69) | .97     |

\*Exposures are modeled individually.

†Atopy cut point defined as 1 or more allergen-specific IgEs &gt; 0.70 IU/mL in that group.

‡Logistic regression used to estimate ORs adjusted for age, sex, race, state, pack years, and asthma case-control status.

**TABLE E6.** Associations between early-life exposures and adult atopy by cut point in the ALHS

| Early-life exposures*                          | No exposure |           | Exposure |           | OR (95% CI)‡     | P value |
|------------------------------------------------|-------------|-----------|----------|-----------|------------------|---------|
|                                                | Atopic†     | Nonatopic | Atopic   | Nonatopic |                  |         |
| Mother lived on farm when pregnant             |             |           |          |           |                  |         |
| 0.35 IU/mL                                     | 353         | 409       | 954      | 1341      | 0.82 (0.69-0.98) | .03     |
| 0.70 IU/mL                                     | 174         | 588       | 394      | 1901      | 0.69 (0.55-0.85) | .001    |
| 3.50 IU/mL                                     | 65          | 697       | 146      | 2149      | 0.73 (0.52-1.01) | .06     |
| Mother performed farm activities when pregnant |             |           |          |           |                  |         |
| 0.35 IU/mL                                     | 438         | 490       | 816      | 1193      | 0.76 (0.64-0.90) | .001    |
| 0.70 IU/mL                                     | 217         | 711       | 326      | 1683      | 0.60 (0.49-0.74) | <.001   |
| 3.50 IU/mL                                     | 88          | 840       | 119      | 1890      | 0.56 (0.41-0.77) | <.001   |
| Mother worked with farm animals when pregnant  |             |           |          |           |                  |         |
| 0.35 IU/mL                                     | 449         | 502       | 770      | 1136      | 0.76 (0.64-0.89) | .001    |
| 0.70 IU/mL                                     | 217         | 734       | 305      | 1601      | 0.62 (0.50-0.77) | <.001   |
| 3.50 IU/mL                                     | 88          | 863       | 110      | 1796      | 0.57 (0.42-0.79) | .001    |
| Family lived on farm when born                 |             |           |          |           |                  |         |
| 0.35 IU/mL                                     | 354         | 403       | 957      | 1349      | 0.81 (0.68-0.96) | .02     |
| 0.70 IU/mL                                     | 175         | 582       | 395      | 1911      | 0.67 (0.54-0.84) | <.001   |
| 3.50 IU/mL                                     | 66          | 691       | 146      | 2160      | 0.70 (0.50-0.98) | .04     |
| Farm animal exposure before age 3              |             |           |          |           |                  |         |
| 0.35 IU/mL                                     | 385         | 435       | 820      | 1173      | 0.79 (0.67-0.94) | .009    |
| 0.70 IU/mL                                     | 182         | 638       | 337      | 1656      | 0.68 (0.54-0.84) | <.001   |
| 3.50 IU/mL                                     | 69          | 751       | 122      | 1871      | 0.67 (0.48-0.93) | .02     |
| Farm animal exposure before age 6              |             |           |          |           |                  |         |
| 0.35 IU/mL                                     | 281         | 336       | 998      | 1360      | 0.88 (0.72-1.06) | .17     |
| 0.70 IU/mL                                     | 141         | 476       | 419      | 1939      | 0.68 (0.54-0.86) | .002    |
| 3.50 IU/mL                                     | 60          | 557       | 150      | 2208      | 0.57 (0.40-0.80) | .001    |

\*Exposures are modeled individually.

†Atopy cut point defined as 1 or more allergen-specific IgEs > 0.70 IU/mL in that group.

‡Logistic regression used to estimate ORs adjusted for age, sex, race, state, pack years, and asthma case-control status.



**TABLE E7.** Associations between the number of types of farm animals to which subjects were exposed *in utero* or early life and adult atopy in the ALHS

|                                                     | Atopic* | Nonatopic | OR (95% CI)†     | P value |
|-----------------------------------------------------|---------|-----------|------------------|---------|
| No. of farm animal types exposed to <i>in utero</i> |         |           |                  |         |
| None                                                | 218     | 740       | Ref              |         |
| 1 vs 0                                              | 42      | 228       | 0.62 (0.43-0.91) | .02     |
| 2 vs 0                                              | 53      | 262       | 0.66 (0.47-0.93) | .02     |
| 3 vs 0                                              | 81      | 379       | 0.68 (0.51-0.92) | .01     |
| 4 vs 0                                              | 75      | 436       | 0.55 (0.41-0.75) | <.001   |
| 5 or more vs 0                                      | 53      | 288       | 0.61 (0.43-0.87) | .007    |
| No. of farm animal types exposed to before age 6    |         |           |                  |         |
| None                                                | 142     | 481       | Ref              |         |
| 1 vs 0                                              | 33      | 145       | 0.73 (0.47-1.13) | .16     |
| 2 vs 0                                              | 83      | 245       | 1.01 (0.73-1.40) | .95     |
| 3 vs 0                                              | 104     | 492       | 0.64 (0.47-0.86) | .003    |
| 4 vs 0                                              | 110     | 617       | 0.54 (0.40-0.74) | <.001   |
| 5 or more vs 0                                      | 87      | 429       | 0.64 (0.46-0.88) | .007    |

\*Atopy cut point defined as 1 or more allergen-specific IgEs > 0.70 IU/mL.

†Logistic regression used to estimate ORs adjusted for age, sex, race, state, pack years, and asthma case-control status.

**TABLE E8.** Tetrachoric correlations between early life farming exposures in the ALHS

|                                                 | Mother lived on farm while pregnant | Mother performed farm activities while pregnant | Mother worked with farm animals while pregnant | Family lived on farm when born | Farm animal exposure before age 3 | Farm animal exposure before age 6 | Breast-fed | Raw milk |
|-------------------------------------------------|-------------------------------------|-------------------------------------------------|------------------------------------------------|--------------------------------|-----------------------------------|-----------------------------------|------------|----------|
| Mother performed farm activities while pregnant | 0.95                                | —                                               | —                                              | —                              | —                                 | —                                 | —          | —        |
| Mother worked with farm animals while pregnant  | 0.94                                | 0.9997                                          | —                                              | —                              | —                                 | —                                 | —          | —        |
| Family lived on farm when born                  | 0.996                               | 0.94                                            | 0.93                                           | —                              | —                                 | —                                 | —          | —        |
| Farm animal exposure before age 3               | 0.84                                | 0.85                                            | 0.86                                           | 0.84                           | —                                 | —                                 | —          | —        |
| Farm animal exposure before age 6               | 0.85                                | 0.85                                            | 0.87                                           | 0.84                           | 0.999                             | —                                 | —          | —        |
| Breast-fed                                      | 0.23                                | 0.31                                            | 0.33                                           | 0.23                           | 0.24                              | 0.24                              | —          | —        |
| Raw milk                                        | 0.48                                | 0.52                                            | 0.54                                           | 0.48                           | 0.47                              | 0.55                              | 0.48       | —        |
| Main milk raw milk                              | 0.62                                | 0.64                                            | 0.64                                           | 0.63                           | 0.62                              | 0.69                              | 0.45       | 0.999    |

Tetrachoric correlation values presented in this table are based on early SAS 9.4 proc corr. Depending on the pair of exposure variables in question, n values ranged from 2421 (mom worked with farm animals while pregnant vs breast-fed) to 3173 (mom lived on farm while pregnant vs family lived on farm when born). Limiting analysis to individuals with atopy data changed results by < 0.02 for all data points.  $P < .0001$  for all correlations.

**TABLE E9.** Associations between early-life exposures and adult allergic symptoms in the ALHS

| Early-life exposures*                           | Current allergic disease† (%) | No current allergic disease (%) | OR (95% CI)‡     |
|-------------------------------------------------|-------------------------------|---------------------------------|------------------|
| Total                                           | 1920                          | 1292                            |                  |
| Mother lived on farm while pregnant             |                               |                                 |                  |
| No                                              | 540 (28.1)                    | 263 (20.4)                      | Ref              |
| Yes                                             | 1353 (70.5)                   | 1016 (78.6)                     | 0.80 (0.66-0.97) |
| Missing                                         | 27 (1.4)                      | 13 (1.0)                        |                  |
| Mother performed farm activities while pregnant |                               |                                 |                  |
| No                                              | 629 (32.8)                    | 348 (26.9)                      | Ref              |
| Yes                                             | 1187 (61.8)                   | 884 (68.4)                      | 0.86 (0.72-1.03) |
| Missing                                         | 104 (5.4)                     | 60 (4.6)                        |                  |
| Mother worked with farm animals while pregnant  |                               |                                 |                  |
| No                                              | 641 (33.4)                    | 352 (27.2)                      | Ref              |
| Yes                                             | 1124 (58.5)                   | 840 (65.0)                      | 0.86 (0.72-1.03) |
| Missing                                         | 155 (8.1)                     | 100 (7.7)                       |                  |
| Family lived on farm when born                  |                               |                                 |                  |
| No                                              | 544 (28.3)                    | 254 (19.7)                      | Ref              |
| Yes                                             | 1353 (70.5)                   | 1024 (79.3)                     | 0.75 (0.62-0.91) |
| Missing                                         | 23 (1.2)                      | 14 (1.1)                        |                  |
| Farm animal exposure before age 3               |                               |                                 |                  |
| No                                              | 546 (28.4)                    | 307 (23.8)                      | Ref              |
| Yes                                             | 1194 (62.2)                   | 869 (67.3)                      | 0.91 (0.75-1.09) |
| Missing                                         | 180 (9.4)                     | 116 (9.0)                       |                  |
| Farm animal exposure before age 6               |                               |                                 |                  |
| No                                              | 418 (21.8)                    | 228 (17.7)                      | Ref              |
| Yes                                             | 1430 (74.5)                   | 1005 (77.8)                     | 0.95 (0.77-1.16) |
| Missing                                         | 72 (3.8)                      | 59 (4.6)                        |                  |
| Breast-fed                                      |                               |                                 |                  |
| No                                              | 683 (35.6)                    | 408 (31.6)                      | Ref              |
| Yes                                             | 908 (47.3)                    | 611 (47.3)                      | 1.02 (0.85-1.24) |
| Missing                                         | 329 (17.1)                    | 273 (21.1)                      |                  |
| Indoor furry pets before age 6                  |                               |                                 |                  |
| No                                              | 1336 (69.6)                   | 970 (75.1)                      | Ref              |
| Yes                                             | 543 (28.3)                    | 300 (23.2)                      | 1.16 (0.97-1.39) |
| Missing                                         | 41 (2.1)                      | 22 (1.7)                        |                  |
| Mother smoked cigarettes while pregnant         |                               |                                 |                  |
| No                                              | 1633 (85.1)                   | 1136 (87.9)                     | Ref              |
| Yes                                             | 192 (10.0)                    | 94 (7.3)                        | 1.15 (0.87-1.53) |
| Missing                                         | 95 (4.9)                      | 62 (4.8)                        |                  |
| Parents smoked cigarettes in house before age 6 |                               |                                 |                  |
| No                                              | 820 (42.7)                    | 606 (46.9)                      | Ref              |
| Yes                                             | 1044 (54.4)                   | 650 (50.3)                      | 1.01 (0.86-1.19) |
| Missing                                         | 56 (2.9)                      | 36 (2.8)                        |                  |

\*Exposures are modeled individually.

†Respondents who answered yes to current eczema or atopic dermatitis in past 12 months and yes to itching/other eczema symptoms in past 12 months or answered yes to any of the following concerning the past 12 months: allergy symptoms, medication use to treat allergy symptoms, nasal problems without cold/flu, itchy/watery eyes with problems, and medication use for nasal problems (n = 149 for current eczema; n = 1899 for current allergies).

‡Logistic regression used to estimate ORs adjusted for age, sex, race, state, asthma case-control status, and pack years.

**TABLE E10.** Associations between early-life exposures and adult atopy and asthma using multinomial regression in the ALHS excluding asthma cases with COPD overlap and likely undiagnosed asthma cases

| Early-life exposures*                          | No exposure | Exposure | OR (95% CI)†     | P value |
|------------------------------------------------|-------------|----------|------------------|---------|
| Mother lived on farm when pregnant             |             |          |                  |         |
| Asthma = no, atopy = no                        | 372         | 1298     | Ref              |         |
| Asthma = no, atopy = yes                       | 75          | 180      | 0.63 (0.46-0.86) | .004    |
| Asthma = yes, atopy = no                       | 161         | 396      | 0.80 (0.63-1.00) | .05     |
| Asthma = yes, atopy = yes                      | 80          | 172      | 0.64 (0.47-0.88) | .006    |
| Mother performed farm activities when pregnant |             |          |                  |         |
| Asthma = no, atopy = no                        | 477         | 1132     | Ref              |         |
| Asthma = no, atopy = yes                       | 93          | 153      | 0.64 (0.47-0.85) | .003    |
| Asthma = yes, atopy = no                       | 170         | 369      | 1.05 (0.84-1.31) | .68     |
| Asthma = yes, atopy = yes                      | 100         | 141      | 0.62 (0.47-0.84) | .002    |
| Mother worked with farm animals when pregnant  |             |          |                  |         |
| Asthma = no, atopy = no                        | 500         | 1070     | Ref              |         |
| Asthma = no, atopy = yes                       | 96          | 141      | 0.66 (0.49-0.88) | .006    |
| Asthma = yes, atopy = no                       | 165         | 357      | 1.17 (0.94-1.47) | .17     |
| Asthma = yes, atopy = yes                      | 97          | 133      | 0.72 (0.53-0.97) | .03     |
| Family lived on farm when born                 |             |          |                  |         |
| Asthma = no, atopy = no                        | 368         | 1302     | Ref              |         |
| Asthma = no, atopy = yes                       | 75          | 181      | 0.63 (0.46-0.86) | .004    |
| Asthma = yes, atopy = no                       | 159         | 400      | 0.81 (0.64-1.02) | .07     |
| Asthma = yes, atopy = yes                      | 80          | 170      | 0.62 (0.46-0.85) | .003    |
| Farm animal exposure before age 6              |             |          |                  |         |
| Asthma = no, atopy = no                        | 321         | 1298     | Ref              |         |
| Asthma = no, atopy = yes                       | 65          | 183      | 0.64 (0.46-0.90) | .009    |
| Asthma = yes, atopy = no                       | 117         | 428      | 1.08 (0.84-1.39) | .53     |
| Asthma = yes, atopy = yes                      | 62          | 187      | 0.80 (0.58-1.12) | .20     |
| Indoor furry pets before age 6                 |             |          |                  |         |
| Asthma = no, atopy = no                        | 1243        | 410      | Ref              |         |
| Asthma = no, atopy = yes                       | 175         | 74       | 1.33 (0.99-1.80) | .06     |
| Asthma = yes, atopy = no                       | 387         | 173      | 1.28 (1.04-1.59) | .02     |
| Asthma = yes, atopy = yes                      | 173         | 78       | 1.33 (0.99-1.79) | .06     |
| Parents smoked in house before age 6           |             |          |                  |         |
| Asthma = no, atopy = no                        | 770         | 872      | Ref              |         |
| Asthma = no, atopy = yes                       | 121         | 130      | 0.94 (0.71-1.23) | .64     |
| Asthma = yes, atopy = no                       | 225         | 322      | 1.22 (1.00-1.49) | .05     |
| Asthma = yes, atopy = yes                      | 94          | 153      | 1.42 (1.07-1.89) | .01     |
| Breast-fed as infant                           |             |          |                  |         |
| Asthma = no, atopy = no                        | 565         | 805      | Ref              |         |
| Asthma = no, atopy = yes                       | 91          | 114      | 0.96 (0.69-1.32) | .78     |
| Asthma = yes, atopy = no                       | 184         | 280      | 1.23 (0.97-1.56) | .09     |
| Asthma = yes, atopy = yes                      | 98          | 110      | 1.00 (0.72-1.37) | .98     |
| Ever drank raw milk                            |             |          |                  |         |
| Asthma = no, atopy = no                        | 337         | 1271     | Ref              |         |
| Asthma = no, atopy = yes                       | 62          | 173      | 0.76 (0.54-1.07) | .12     |
| Asthma = yes, atopy = no                       | 116         | 417      | 1.09 (0.84-1.41) | .52     |
| Asthma = yes, atopy = yes                      | 59          | 182      | 1.03 (0.73-1.46) | .85     |
| Raw milk was main milk                         |             |          |                  |         |
| Asthma = no, atopy = no (ref)                  | 593         | 1034     | Ref              |         |
| Asthma = no, atopy = yes                       | 109         | 140      | 0.74 (0.54-1.01) | .06     |
| Asthma = yes, atopy = no                       | 213         | 329      | 1.01 (0.80-1.27) | .95     |
| Asthma = yes, atopy = yes                      | 112         | 129      | 0.79 (0.57-1.08) | .13     |

Atopy cut point defined as 1 or more allergen-specific IgEs > 0.70 IU/mL in that group. Asthma cases restricted to those who responded “yes” to ever have or still have asthma and “no” to ever diagnosed with COPD or emphysema.

\*Exposures are modeled individually.

†Logistic regression used to estimate ORs adjusted for age, sex, race, state, and pack years.

**TABLE E11.** Associations between farm animal exposure across life span and current asthma in the ALHS

| Farm animal exposure                   | Cases | Noncases | OR (95% CI)*     | P value |
|----------------------------------------|-------|----------|------------------|---------|
| <i>In utero</i> , childhood            |       |          |                  |         |
| <i>In utero</i> = no, childhood = no   | 208   | 339      | Ref              |         |
| <i>In utero</i> = yes, childhood = no  | 17    | 48       | 0.63 (0.35-1.13) | .12     |
| <i>In utero</i> = no, childhood = yes  | 159   | 260      | 1.09 (0.83-1.42) | .54     |
| <i>In utero</i> = yes, childhood = yes | 679   | 1177     | 1.12 (0.91-1.39) | .29     |
| Missing                                | 135   | 207      |                  |         |
| Childhood, adulthood                   |       |          |                  |         |
| Childhood = no, adulthood = no         | 162   | 295      | Ref              |         |
| Childhood = yes, adulthood = no        | 486   | 798      | 1.26 (1.00-1.58) | .05     |
| Childhood = no, adulthood = yes        | 73    | 109      | 1.19 (0.83-1.70) | .34     |
| Childhood = yes, adulthood = yes       | 410   | 731      | 1.17 (0.91-1.49) | .22     |
| Missing                                | 67    | 98       |                  |         |

\*Logistic regression used to estimate ORs adjusted for age, sex, race, state, and pack years.

**TABLE E12.** Associations between farm animal exposure across life span and adult atopy in the ALHS

| Farm animal exposure                       | Atopic* | Nonatopic | OR (95% CI)†     | P value |
|--------------------------------------------|---------|-----------|------------------|---------|
| <i>In utero</i> , childhood prior to age 6 |         |           |                  |         |
| <i>In utero</i> = no, childhood = no       | 119     | 401       | Ref              |         |
| <i>In utero</i> = yes, childhood = no      | 11      | 54        | 0.75 (0.37-1.53) | .43     |
| <i>In utero</i> = no, childhood = yes      | 93      | 311       | 0.94 (0.68-1.29) | .69     |
| <i>In utero</i> = yes, childhood = yes     | 289     | 1499      | 0.61 (0.47-0.80) | <.001   |
| Missing                                    | 66      | 261       |                  |         |
| Childhood prior to age 6, adulthood        |         |           |                  |         |
| Childhood = no, adulthood = no             | 99      | 343       | Ref              |         |
| Childhood = yes, adulthood = no            | 227     | 1029      | 0.73 (0.55-0.97) | .03     |
| Childhood = no, adulthood = yes            | 41      | 132       | 0.96 (0.62-1.48) | .85     |
| Childhood = yes, adulthood = yes           | 191     | 906       | 0.61 (0.45-0.83) | .002    |
| Missing                                    | 20      | 116       |                  |         |

\*Atopy cut point defined as 1 or more allergen-specific IgEs > 0.70 IU/mL.

†Logistic regression used to estimate ORs adjusted for age, sex, race, state, pack years, and asthma case-control status.
